# Supplementary material for: Urbanization alters communities of flying arthropods in parks and gardens of a medium-sized city
Source: PeerJ. 2017 Sep 4;5:e3620. doi: 10.7717/peerj.3620 (PMC5590548; doi:10.7717/peerj.3620)
Supplement: Supplemental Information 3 — The first file needed to run the NMDS analysis (predictors). [file peerj-05-3620-s003.csv]

Site	Category	Lat	Long	Month	Distance	Canopy	Trees	Imp	Soil	Humidity	Flowers	Temp	Bare	Herb	Abundance
1	Park	41.699444	-83.58942	July	6727	17.94	0	41.2	76.75	52.55	34.5	84.9	12.5	83.75	23
2	Park	41.547649	-83.670528	July	16477	15.86	1	16.84	177.5455	71.75	51	80.05	30.625	48.75	67.5
3	Park	41.591447	-83.441106	July	10774	0	0	16.24489796	321	66.75	83	79.15	25.625	69.375	71
4	Garden	41.684005	-83.496	July	4499	2.6	3	37.025	131.375	63.65	60	76.5	22.5	75	49.5
5	Garden	41.65716	-83.548829	July	1169	0	0	73.2972973	331.75	45.3	40	84.55	7.5	92.5	20.5
6	Park	41.662816	-83.482894	July	4490	27.82	3	20.23762376	174.5	51.15	119.5	82.45	4.375	76.25	44.5
7	Park	41.705007	-83.476851	July	7573	0	1	46	158	54.1	23	83.8	26.25	58.75	35.5
8	Park	41.680906	-83.523907	July	3011	8.84	3	48.65811966	141.375	43.1	73.5	87.9	11.25	80	11.5
9	Garden	41.611451	-83.619488	July	8562	6.24	3	47.69026549	230.125	63.5	58.5	85.3	12.5	71.25	36
10	Park	41.711385	-83.746782	July	18764	0	6	37.75	159.25	38.8	33	94.05	28.75	67.5	33.5
11	Park	41.69856	-83.628498	July	9145	21.06	1	28.28301887	83.875	69.95	46	79.05	3.75	83.75	15.5
12	Park	41.725392	-83.577941	July	8599	20.54	10	34.16949153	89.75	65.3	22	79.95	5	82.5	33
13	Park	41.647158	-83.527011	July	1126	33.8	3	59.28431373	294.875	50.9	66	85.9	11.875	80	28
14	Garden	41.617896	-83.793218	July	21884	20.54	4	5.625	136.75	57.9	76.5	86.8	11.25	77.5	53
15	Park	41.629164	-83.807397	July	21000	6.76	1	7.666666667	118.625	62.75	83.5	85.8	2.5	85	85
16	Garden	41.641035	-83.512748	July	2425	5.2	1	59.95614035	270.5	49.8	88.5	84.5	18.75	67.5	48
17	Garden	41.669993	-83.584299	July	4419	1.04	0	40.10416667	481.25	37.5	85	88.65	8.75	91.25	31
18	Garden	41.584381	-83.541465	July	7080	3.38	5	53.18918919	463.5	72.7	37.5	74.1	32.5	53.75	53
19	Park	41.649747	-83.533112	July	638	104.26	3	70.97333333	218	51.55	21	81.35	36.25	56.25	13
20	Park	41.681981	-83.716667	July	15394	8.32	0	20.87804878	48.5	48.1	40.5	94.6	26.25	63.75	47.5
21	Park	41.623398	-83.703558	July	14565	28.08	2	49.68627451	82.375	43	10	94.9	27.5	68.75	11.5
22	Park	41.696055	-83.752405	July	18863	0	0	32	152.625	48.25	107.5	90.3	3.75	78.75	31.5
23	Garden	41.607356	-83.656929	July	11345	2.08	0	36.93457944	203	67.55	51	76.75	11.25	85	38.5
24	Garden	41.63658	-83.654443	July	9995	3.12	0	33.14285714	221.875	50.65	76.5	81.25	11.25	79.375	87
25	Garden	41.659355	-83.620516	July	7142	0	0	42.99137931	136.375	61.3	41.5	85.2	11.25	83.75	63.5
26	Park	41.713295	-83.676012	July	13393	0.52	3	61.79661017	59.625	69.7	6.5	78.15	17.5	77.5	15.5
27	Park	41.681884	-83.572278	July	4447	46.28	3	39.39655172	92.125	42.35	36.5	83.6	28.75	70	22.5
28	Park	41.584065	-83.590436	July	9528	14.04	2	19.44827586	345.75	61.75	50	80.6	5	88.125	33
29	Park	41.621142	-83.584585	July	5601	0	4	47.74117647	159.875	49.15	60	92.15	18.75	66.25	52
30	Park	41.617878	-83.577984	July	5200	1.04	2	53.06034483	54.75	61	72	76.95	23.75	71.875	31.5
		41.699444	-83.58942
		41.547649	-83.670528
		41.591447	-83.441106
		41.684005	-83.496
		41.65716	-83.548829
		41.662816	-83.482894
		41.705007	-83.476851
		41.680906	-83.523907
		41.611451	-83.619488
		41.711385	-83.746782
		41.69856	-83.628498
		41.725392	-83.577941
		41.647158	-83.527011
		41.617896	-83.793218
		41.629164	-83.807397
		41.641035	-83.512748
		41.669993	-83.584299
		41.584381	-83.541465
		41.649747	-83.533112
		41.681981	-83.716667
		41.623398	-83.703558
		41.696055	-83.752405
		41.607356	-83.656929
		41.63658	-83.654443
		41.659355	-83.620516
		41.713295	-83.676012
		41.681884	-83.572278
		41.584065	-83.590436
		41.621142	-83.584585
		41.617878	-83.577984
